# Supplementary material
Source: publisher site journal article supplement (https://www.dovepress.com/article/488841)
Supplement: Supplementary file 1 [file get_supplementary_file.php]

**Supplementary Information**

**1. Sequence Comparison of ZNF652 with Zfp652**

We utilized the Basic Local Alignment Search Tool (BLAST) from the National Center for Biotechnology Information (NCBI) to identify regions of similarity between the nucleotide and protein sequences of ZNF652 and Zfp652. Our analysis revealed that the mRNA sequences exhibited 21% similarity (Supplementary Figure 1), as detailed in Supplementary Text 1. The protein sequences demonstrated a complete match with 100% similarity (Supplementary Figure 2), with results presented in Supplementary Text 2.


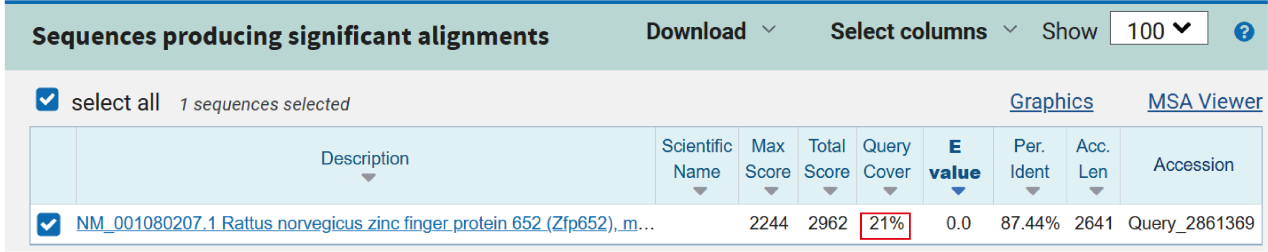


**Supplementary Figure 1** An mRNA sequences similarity of 21% between ZNF652 and Zfp652.

**Text 1: mRNA sequences similarity between ZNF652 and Zfp652**

Query: NM_001145365.3 Homo sapiens zinc finger protein 652 (ZNF652), transcript variant 1, mRNA Query ID: lcl|Query_2861367 Length: 11628

>NM_001080207.1 Rattus norvegicus zinc finger protein 652 (Zfp652), mRNA

Sequence ID: Query_2861369 Length: 2641

Range 1: 1 to 1955

Score:2244 bits (1215), Expect:0.0,

Identities:1727/1975(87%), Gaps:31/1975(1%), Strand: Plus/Plus

Query 449 CACTGGAAGAATTGCACACAGTTTCCAGGAATATCtttttttCA--T-TTGAGT-G--A- 501

||| ||||||| ||| ||| ||||||| | |||| |||||| | |||||| | |

Sbjct 1 CACAGGAAGAACTGCGTGCAGACTCCAGGAGTTTCTTATTTTCACTTCTTGAGTAGTTAG 60

Query 502 TTCTTTGTGGATG-AGAAAAGATTTGAGTCTTAATAATTACCTTGTTTTAAAGCTATTTC 560

|||| |||||||| || ||||||| |||| || ||||| || |||||| ||| | |||

Sbjct 61 TTCTCTGTGGATGGAG-AAAGATTCGAGT-TT--TAATTGCCCTGTTTTCAAGGT-GTTC 115

Query 561 TTTATAGTCTGAACTGTTTAATAAATTGGGCCACTTACCAATGAGCCACACAGCCAGTTC 620

| | |||||||||| |||||||||| ||||||||| ||||||||||| |

Sbjct 116 TGTGTAGTCTGAAC------------TGGGCCACTTCCCAATGAGCTACACAGCCAGTCC 163

Query 621 TTGTCAGGAGCTGGTTGAAAACTGTGCTGTGCATGTAGCAGGAATGGCACAAGAAGATAG 680

||||||||| ||||||||| |||||| ||||||| || ||||||||| || ||||| ||

Sbjct 164 TTGTCAGGAACTGGTTGAACCCTGTGCAGTGCATGCAGAAGGAATGGCCCAGGAAGAGAG 223

Query 681 CCGTCGTGGTCAAGTGCCATCTTCCTTTTATCATGGTGCCAACCAAGAACTTGACCTGTC 740

|| ||| |||||| ||| || |||| ||||||||||| | ||| || || ||||||||

Sbjct 224 CCATCGAAGTCAAGCACCACCTACCTTCTATCATGGTGCTAGCCAGGAGCTCGACCTGTC 283

Query 741 CACCAAAGTGTACAAAAGGGAATCAGGAAGTCCTTATTCTGTGTTAGTGGACACCAAGAT 800

||||||||| || ||||||||||| ||||| ||||| ||||| ||| || |||||||

Sbjct 284 CACCAAAGTATATAAAAGGGAATCTGGAAGCCCTTACTCTGTTCTAGCAGATTCCAAGAT 343

Query 801 GAGCAAACCGCATCTCCATGAAACAGAAGAACAGCCATATTTCAGGGAGACAAGAGCAGT 860

||||||||| |||||||| || || || || |||||||||||||||||| |||| |||||

Sbjct 344 GAGCAAACCACATCTCCACGAGACCGAGGAGCAGCCATATTTCAGGGAGCCAAGGGCAGT 403

Query 861 GTCTGACGTGCATGCTGTTAAGGAAGACCGGGAGAATTCTGATGACACAGAGGAGGAAGA 920

|||||||||||| |||| || ||||||||||||||||||||||||||||| | || ||

Sbjct 404 GTCTGACGTGCACACTGTCAAAGAAGACCGGGAGAATTCTGATGACACAGA--A-GAGGA 460

Query 921 GGAAGAAGTCTCTTACAAAAGGGAGCAGATCATAGTGGAGGTAAACCTTAATAATCAAAC 980

||| ||||||||||||||||||||||||||||||||||||||||||||||||||||||||

Sbjct 461 GGAGGAAGTCTCTTACAAAAGGGAGCAGATCATAGTGGAGGTAAACCTTAATAATCAAAC 520

Query 981 ATTAAATGTATCTAAAGGGGAAAAGGGTGTCTCTTCTCAGTCCAAAGAGACTCCTGTTCT 1040

||||||||||||||||||||||||||||||||||||||||||||||||||||||||||||

Sbjct 521 ATTAAATGTATCTAAAGGGGAAAAGGGTGTCTCTTCTCAGTCCAAAGAGACTCCTGTTCT 580

Query 1041 TAAGACAAGCAGTGAGGAGGAAGAGGAAGAGAGTGAGGAAGAGGCCACAGATGACAGCAA 1100

|||||||||||| ||||| ||||||||||||| |||||| || ||||||||| ||||||

Sbjct 581 TAAGACAAGCAGCGAGGAAGAAGAGGAAGAGACTGAGGAGGACGCCACAGATAACAGCAG 640

Query 1101 TGACTATGGAGAGAATGAAAAGCAGAAGAAAAAGGAGAAGATAGTAGAGAAAGTCAGCGT 1160

|||||| |||||||| | | ||||||||||||||||||| ||| ||||||||||| ||

Sbjct 641 TGACTACGGAGAGAACGGACGGCAGAAGAAAAAGGAGAAGCAAGTGGAGAAAGTCAGGGT 700

Query 1161 TACACAAAGGAGAACCAGGAGAGCTGCCTCTGTTGCCGCAGCTACCACTTCCCCTACTCC 1220

|||||||||| ||||| |||||||||||||||||||||||||||||||||||||||| ||

Sbjct 701 TACACAAAGGCGAACCCGGAGAGCTGCCTCTGTTGCCGCAGCTACCACTTCCCCTACGCC 760

Query 1221 CAGAACTACAAGAGGTCGTAGGAAGAGTGTAGAGCCACCTAAGCGTAAGAAGCGGGCCAC 1280

| | || || |||| || |||||||||| ||||| ||||||| | |||||||||||| |

Sbjct 761 CCGTACAACTCGAGGCCGGAGGAAGAGTGCAGAGCTACCTAAGAGGAAGAAGCGGGCCGC 820

Query 1281 AAAGGAGCCCAAAGCACCAGTCCAGAAAGCTAAGTGTGAAGAGAAAGAGACTCTGACCTG 1340

|||||||| ||||| ||||||||||||||||||||||| |||||||||||||| |||||

Sbjct 821 CAAGGAGCCTAAAGCGCCAGTCCAGAAAGCTAAGTGTGACGAGAAAGAGACTCTCACCTG 880

Query 1341 TGAGAAGTGCCCCAGGGTATTTAACACTCGCTGGTACCTGGAGAAGCACATGAACGTTAC 1400

|||||||||||| ||||| ||||| |||||||||||||||||||||||||||||||||||

Sbjct 881 TGAGAAGTGCCCTAGGGTGTTTAATACTCGCTGGTACCTGGAGAAGCACATGAACGTTAC 940

Query 1401 TCATAGGCGCATGCAGATTTGTGATAAATGTGGCAAGAAGTTTGTCCTGGAAAGTGAGCT 1460

||| |||||||||||||| |||||||||||||||||||||||||||||||||||||||||

Sbjct 941 TCACAGGCGCATGCAGATCTGTGATAAATGTGGCAAGAAGTTTGTCCTGGAAAGTGAGCT 1000

Query 1461 GTCCCTTCACCAGCAAACAGACTGTGaaaaaaaCATTCAGTGTGTTTCCTGTAACAAATC 1520

||||||||||||||| ||||||||||||||||||||||||||||| ||||||||||||||

Sbjct 1001 GTCCCTTCACCAGCAGACAGACTGTGAAAAAAACATTCAGTGTGTCTCCTGTAACAAATC 1060

Query 1521 GTTCAAGAAACTCTGGTCCCTTCATGAACATATCAAGATCGTCCATGGATATGCAGAAAA 1580

|||||||||||||||||||||||||||||||||||||| ||||||||||||||||||||

Sbjct 1061 CTTCAAGAAACTCTGGTCCCTTCATGAACATATCAAGATTGTCCATGGATATGCAGAAAA 1120

Query 1581 GAAATTTTCCTGTGAAATTTGTGAGAAGAAATTCTATACCATGGCTCATGTGCGGAAACA 1640

|||||| ||||||| ||||| |||||||| |||||||||||||||||||| ||||||||

Sbjct 1121 AAAATTTGCCTGTGAGATTTGCGAGAAGAAGTTCTATACCATGGCTCATGTACGGAAACA 1180

Query 1641 CATGGTTGCACACACAAAAGACATGCCATTTACATGCGAAACCTGTGGAAAATCATTCAA 1700

|||||||||||||||||||||||||||||||||||| || ||||||||||| || |||||

Sbjct 1181 CATGGTTGCACACACAAAAGACATGCCATTTACATGTGAGACCTGTGGAAAGTCTTTCAA 1240

Query 1701 ACGCAGTATGTCACTCAAGGTGCACTCCTTGCAGCATTCTGGAGAGAAGCCCTTTAGATG 1760

||||||||||||||||||||||||||||||||||||||||||||||| ||||| |||||

Sbjct 1241 GCGCAGTATGTCACTCAAGGTGCACTCCTTGCAGCATTCTGGAGAGAAACCCTTCAGATG 1300

Query 1761 CGAGAACTGTGACGAAAGGTTTCAGTACAAGTACCAGCTACGCTCCCACATGAGCATTCA 1820

|||||||| ||||| ||||| ||||||||||||||||| ||||||||||||||||| ||

Sbjct 1301 TGAGAACTGCGACGAGAGGTTCCAGTACAAGTACCAGCTCCGCTCCCACATGAGCATCCA 1360

Query 1821 TATTGGGCACAAACAGTTCATGTGCCAGTGGTGTGGCAAGGATTTCAACATGAAGCAGTA 1880

|| |||||||| |||||||||||||||||||| |||||||| |||||||||||||||||

Sbjct 1361 CATCGGGCACAAGCAGTTCATGTGCCAGTGGTGCGGCAAGGACTTCAACATGAAGCAGTA 1420

Query 1881 CTTCGACGAACACATGAAAACACACACTGGAGAGAAACCCTTTATCTGTGAAATCTGTGG 1940

||||||||| |||||||| || ||||||||||||||||| ||||||||||||||||||||

Sbjct 1421 CTTCGACGAGCACATGAAGACGCACACTGGAGAGAAACCTTTTATCTGTGAAATCTGTGG 1480

Query 1941 CAAAAGCTTCACCAGCCGCCCCAACATGAAGAGACACCGCAGAACTCACACAGGCGAGAA 2000

||||||||||||||| || |||||||||||||| ||||||||||||||||||||||||||

Sbjct 1481 CAAAAGCTTCACCAGTCGACCCAACATGAAGAGGCACCGCAGAACTCACACAGGCGAGAA 1540

Query 2001 GCCCTATCCATGTGATGTGTGTGGCCAGCGGTTCCGCTTCTCGAACATGCTTAAGGCCCA 2060

|||||| || ||||| |||||||| |||||||||||||| || |||||||| ||||||||

Sbjct 1541 GCCCTACCCCTGTGACGTGTGTGGTCAGCGGTTCCGCTTTTCCAACATGCTGAAGGCCCA 1600

Query 2061 CAAGGAGAAGTGCTTTCGGGTGACCAGCCCCGTGAATGTGCCACCTGCTGTCCAGATCCC 2120

||||||||||||||| || ||||||||||| |||||||||||||| || |||||||||||

Sbjct 1601 CAAGGAGAAGTGCTTCCGAGTGACCAGCCCAGTGAATGTGCCACCAGCGGTCCAGATCCC 1660

Query 2121 ACTTACAACTTCCCCAGCCACCCCAGTTCCTTCTGTGGTGAACACAGCCACAACCCCAAC 2180

| | | | | |||||| | |||| ||| | |||| ||||| |||| | |||| |

Sbjct 1661 ATTGGCCTCAGCTCCAGCCGCTCCAGCTCCAGCCGTGGCCAACACTCCCACGAGCCCAGC 1720

Query 2181 CCCTCCAATCAATATGAATCCTGTAAGcact---cttccccctcggcccatcccccaccc 2237

||| || ||| |||||| ||||| | | | |||||| | | ||| |||| |||||

Sbjct 1721 CCCCGCAGTCAGTATGAACCCTGTGGGTAGTGCACTTCCCTCAAGACCCGTCCCACACCC 1780

Query 2238 cttctcacacctgcacatccacccacaccctcaccacccacaccaccttcccatccctcc 2297

|||||||||||||||||||||| | || || |||||| | ||||||||||||||||||||

Sbjct 1781 CTTCTCACACCTGCACATCCACACGCATCCACACCACTCGCACCACCTTCCCATCCCTCC 1840

Query 2298 agtccctcacctcccgccacctccaGCTCTCTTTAAGAGTGAGCCTTTAAATCATAGAGG 2357

|| |||||||| || || |||||||||||||| ||||||||||| |||| || ||| |

Sbjct 1841 TGTGCCTCACCTGCCCCCGCCTCCAGCTCTCTTCAAGAGTGAGCCCCTAAACCACAGAAG 1900

Query 2358 CCAGAGTGAGGACAACTTTCTGCGGCACCTGGCAGAGAAGAACAGTTCAGCACAG 2412

|||||| ||||||| ||||||| |||||||||| ||||||||||| |||| |||

Sbjct 1901 CCAGAGCGAGGACACCTTTCTGAGGCACCTGGCGGAGAAGAACAGCCCAGCCCAG 1955

Range 2: 2125 to 2641

Score:717 bits (388), Expect:0.0,

Identities:480/524(92%), Gaps:7/524(1%), Strand: Plus/Plus

Query 2616 AAACCAGGGGAACCACTGAACTAAAGCCCAATTTGCTTGCATTTTCTGATGACTTTTATA 2675

|||||||||||||||| |||||||||||||||||||||||||||||||||||||||||||

Sbjct 2125 AAACCAGGGGAACCACCGAACTAAAGCCCAATTTGCTTGCATTTTCTGATGACTTTTATA 2184

Query 2676 AGTTTCAAATACTCAGACTTGTGGAATTTTATAATTTCATATCAGCTGATGAGGTATGCT 2735

| ||||| ||||| || |||||| ||||||||||||||||||||| |||||||||||||

Sbjct 2185 AATTTCAGATACTGTGA-TTGTGGGATTTTATAATTTCATATCAGCGGATGAGGTATGCT 2243

Query 2736 TGCTTTTATATCCCAGACTTCTCCTCAAAGAGGGGATAGGCCTGGTTTCCTTTGTACTAA 2795

|||||||||||||| | |||||||||||||||||||| ||||||||||||||| ||||||

Sbjct 2244 TGCTTTTATATCCCGGTCTTCTCCTCAAAGAGGGGATGGGCCTGGTTTCCTTTATACTAA 2303

Query 2796 TCGGGAAGGCTGTGAGATTAATCCAGAGCATTAATTGTATCACTGTGTATGGTAAGGAAT 2855

|||||||||||||||||||||||||||||||||| ||||||||||||||| |||| ||||

Sbjct 2304 TCGGGAAGGCTGTGAGATTAATCCAGAGCATTAACTGTATCACTGTGTATTGTAATGAAT 2363

Query 2856 TCTTTTCAGCTTTTGGTGCCAGCTACAGAGTTGAGCTGGCCATGTTTCACAGTATATCAA 2915

||||||||||||||||||| ||| |||||| | ||||||| ||||||||| |||||||

Sbjct 2364 TCTTTTCAGCTTTTGGTGCTGGCTGCAGAGTCGCGCTGGCCTTGTTTCACACAATATCAA 2423

Query 2916 GCATTATAGAGAAAGACAGAAATTTTCTTCTTTGTGTAGCTCTCCTAACGCACTCTTTAT 2975

||||||||||| |||| | | ||| ||||||||||||||||| |||| ||||||||||

Sbjct 2424 GCATTATAGAG-AAGATGGGAGTTTCCTTCTTTGTGTAGCTCTTTTAACACACTCTTTAT 2482

Query 2976 TTTACTACAGAAATTATTTTAGAGTTTTTGTATAGACTTCTTTGGTAGTCTGTTTCTAAA 3035

|||||||||||||||||||||||| |||||||||||||| | ||||||||||||||||

Sbjct 2483 TTTACTACAGAAATTATTTTAGAGGTTTTGTATAGACTT-TA--GTAGTCTGTTTCTAAA 2539

Query 3036 ATGAAATGTATTTCAATAAGCAGTGTAATTTTTTCAGTGTAGCTGAACCTATGTTGTAAA 3095

|||| |||||||||||||||| |||||||||||||||||||||| |||| ||||||||||

Sbjct 2540 ATGAGATGTATTTCAATAAGCTGTGTAATTTTTTCAGTGTAGCTAAACCCATGTTGTAAA 2599

Query 3096 ATAGaaaaaaaTTTTTATAATCATCAAAATGTGATTCTTAAAGA 3139

||||| ||||||||||||||||||||||||||||||||||||

Sbjct 2600 ATAGAT--AAATTTTTATAATCATCAAAATGTGATTCTTAAAGA 2641


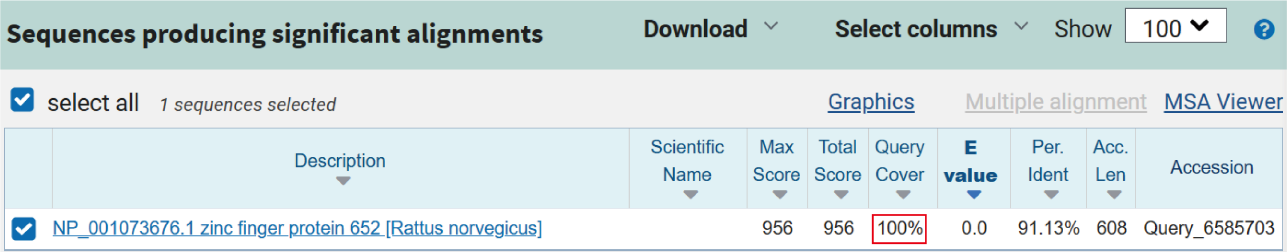


**Supplementary Figure 2** An protein sequences similarity of 100% between ZNF652 and Zfp652.

**Text 2: Protein sequences similarity between ZNF652 and Zfp652**

Query: NP_001138837.1 zinc finger protein 652 [Homo sapiens] Query ID: lcl|Query_6585701 Length: 606

>NP_001073676.1 zinc finger protein 652 [Rattus norvegicus]

Sequence ID: Query_6585703 Length: 608

Range 1: 1 to 608

Score:956 bits(2472), Expect:0.0,

Method:Compositional matrix adjust.,

Identities:555/609(91%), Positives:574/609(94%), Gaps:4/609(0%)

Query 1 MSHTASSCQELVENCAVHVAGMAQEDSRRGQVPSSFYHGANQELDLSTKVYKRESGSPYS 60

MS+TAS CQELVE CAVH GMAQE+S R Q P +FYHGA+QELDLSTKVYKRESGSPYS

Sbjct 1 MSYTASPCQELVEPCAVHAEGMAQEESHRSQAPPTFYHGASQELDLSTKVYKRESGSPYS 60

Query 61 VLVDTKMSKPHLHETEEQPYFRETRAVSDVHAVKEDRENSDDTEEEEEEVSYKREQIIVE 120

VL D+KMSKPHLHETEEQPYFRE RAVSDVH VKEDRENSDDTEEEEE VSYKREQIIVE

Sbjct 61 VLADSKMSKPHLHETEEQPYFREPRAVSDVHTVKEDRENSDDTEEEEE-VSYKREQIIVE 119

Query 121 VNLNNQTLNVSKGEKGVSSQSKETPVLKTSSEEEEEESEEEATDDSNDYGENEKQKKKEK 180

VNLNNQTLNVSKGEKGVSSQSKETPVLKTSSEEEEEE+EE+ATD+S+DYGEN +QKKKEK

Sbjct 120 VNLNNQTLNVSKGEKGVSSQSKETPVLKTSSEEEEEETEEDATDNSSDYGENGRQKKKEK 179

Query 181 IVEKVSVTQRRTRRAASVAAATTSPTPRTTRGRRKSVEPPKRKKRATKEPKAPVQKAKCE 240

VEKV VTQRRTRRAASVAAATTSPTPRTTRGRRKS E PKRKKRA KEPKAPVQKAKC+

Sbjct 180 QVEKVRVTQRRTRRAASVAAATTSPTPRTTRGRRKSAELPKRKKRAAKEPKAPVQKAKCD 239

Query 241 EKETLTCEKCPRVFNTRWYLEKHMNVTHRRMQICDKCGKKFVLESELSLHQQTDCEKNIQ 300

EKETLTCEKCPRVFNTRWYLEKHMNVTHRRMQICDKCGKKFVLESELSLHQQTDCEKNIQ

Sbjct 240 EKETLTCEKCPRVFNTRWYLEKHMNVTHRRMQICDKCGKKFVLESELSLHQQTDCEKNIQ 299

Query 301 CVSCNKSFKKLWSLHEHIKIVHGYAEKKFSCEICEKKFYTMAHVRKHMVAHTKDMPFTCE 360

CVSCNKSFKKLWSLHEHIKIVHGYAEKKF+CEICEKKFYTMAHVRKHMVAHTKDMPFTCE

Sbjct 300 CVSCNKSFKKLWSLHEHIKIVHGYAEKKFACEICEKKFYTMAHVRKHMVAHTKDMPFTCE 359

Query 361 TCGKSFKRSMSLKVHSLQHSGEKPFRCENCDERFQYKYQLRSHMSIHIGHKQFMCQWCGK 420

TCGKSFKRSMSLKVHSLQHSGEKPFRCENCDERFQYKYQLRSHMSIHIGHKQFMCQWCGK

Sbjct 360 TCGKSFKRSMSLKVHSLQHSGEKPFRCENCDERFQYKYQLRSHMSIHIGHKQFMCQWCGK 419

Query 421 DFNMKQYFDEHMKTHTGEKPFICEICGKSFTSRPNMKRHRRTHTGEKPYPCDVCGQRFRF 480

DFNMKQYFDEHMKTHTGEKPFICEICGKSFTSRPNMKRHRRTHTGEKPYPCDVCGQRFRF

Sbjct 420 DFNMKQYFDEHMKTHTGEKPFICEICGKSFTSRPNMKRHRRTHTGEKPYPCDVCGQRFRF 479

Query 481 SNMLKAHKEKCFRVTSPVNVPPAVQIPLTTSPATPVPSVVNTATTPTPPINMNPV-STLP 539

SNMLKAHKEKCFRVTSPVNVPPAVQIPL ++PA P P+V NT T+P P ++MNPV S LP

Sbjct 480 SNMLKAHKEKCFRVTSPVNVPPAVQIPLASAPAAPAPAVANTPTSPAPAVSMNPVGSALP 539

Query 540 PRPIPHPFSHLHIHPHPHHPHHLPIPPVPHLPPPPALFKSEPLNHRGQSEDNFLRHLAEK 599

RP+PHPFSHLHIH HPHH HHLPIPPVPHLPPPPALFKSEPLNHR QSED FLRHLAEK

Sbjct 540 SRPVPHPFSHLHIHTHPHHSHHLPIPPVPHLPPPPALFKSEPLNHRSQSEDTFLRHLAEK 599

Query 600 NS--SAQHH 606

NS AQHH

Sbjct 600 NSPAQAQHH 608
